# Supplementary material
Source: PubMed Central journal article supplement (PMC3634878)
Supplement: NIHMS455561-supplement-01.pdf [file NIHMS455561-supplement-01.pdf]

**Appendix A. Supplementary Table S1. Standardized factor loadings for the measurement model (N=404).**

|                                          | Offspring<br>maladaptive<br>attributes in the<br>late 30s | Maternal<br>maladaptive<br>attributes in the<br>mid-60s | Offspring<br>maladaptive<br>attributes in<br>adolescence | Mother-child<br>weak attachment<br>relationship<br>during the<br>offspring's<br>adolescence | Maternal<br>maladaptive<br>attributes in the<br>early 40s |
|------------------------------------------|-----------------------------------------------------------|---------------------------------------------------------|----------------------------------------------------------|---------------------------------------------------------------------------------------------|-----------------------------------------------------------|
| Offspring depressed mood in the late 30s | 0.55 (12.77)                                              |                                                         |                                                          |                                                                                             |                                                           |
| Offspring ego control in the late 30s    | -0.82 (-21.04)                                            |                                                         |                                                          |                                                                                             |                                                           |
| Offspring impulsivity in the late 30s    | 0.63 (15.04)                                              |                                                         |                                                          |                                                                                             |                                                           |
| Maternal depressed mood in the mid-60s   |                                                           | 0.85 (29.74)                                            |                                                          |                                                                                             |                                                           |
| Maternal ego control in the mid-60s      |                                                           | -0.66 (-18.68)                                          |                                                          |                                                                                             |                                                           |
| Maternal self-esteem in the mid-60s      |                                                           | -0.68 (-20.14)                                          |                                                          |                                                                                             |                                                           |
| Offspring depressed mood in adolescence  |                                                           |                                                         | 0.52 (10.99)                                             |                                                                                             |                                                           |
| Offspring ego control in adolescence     |                                                           |                                                         | -0.77 (-18.81)                                           |                                                                                             |                                                           |
| Offspring impulsivity in adolescence     |                                                           |                                                         | 0.60 (13.68)                                             |                                                                                             |                                                           |
| Child's resistance to maternal control   |                                                           |                                                         |                                                          | 0.34 (4.93)                                                                                 |                                                           |
| Maternal identification                  |                                                           |                                                         |                                                          | -0.61 (-9.61)                                                                               |                                                           |
| Maternal affection                       |                                                           |                                                         |                                                          | -0.51 (-8.66)                                                                               |                                                           |
| Maternal depressed mood in the early 40s |                                                           |                                                         |                                                          |                                                                                             | 0.69 (18.55)                                              |
| Maternal ego control in the early 40s    |                                                           |                                                         |                                                          |                                                                                             | -0.69 (-18.70)                                            |
| Maternal self-esteem in the early 40s    |                                                           |                                                         |                                                          |                                                                                             | -0.65 (-16.95)                                            |

Notes:

<sup>a</sup> - All factor loadings were significant at  $p < 0.001$ ;

<sup>b</sup> - The offspring's age, gender, smoking in adolescence, and the mother's age and educational level were statistically controlled.
